# Supplementary material for: Methane dimer rovibrational states and Raman transition moments
Source: Royal Society of Chemistry journal article supplement (doi:10.1039/d3cp06222h), 2024-01-01
Supplement: d3cp06222h1.pdf [file d3cp06222h1.pdf]

## Supplementary Information: Methane dimer rovibrational states and Raman transition moments

Alberto Martín Santa Daría,<sup>1</sup> Gustavo Avila,<sup>2</sup> and Edit Mátyus<sup>2,\*</sup>

<sup>1</sup>*Departamento de Química Física,  
Universidad de Salamanca, Spain; ELTE,  
Eötvös Loránd University, Institute of Chemistry,  
Pázmány Péter sétány 1/A 1117 Budapest, Hungary*  
<sup>2</sup>*ELTE, Eötvös Loránd University, Institute of Chemistry,  
Pázmány Péter sétány 1/A 1117 Budapest, Hungary*

(Dated: December 21, 2023)

---

\* [edit.matyus@ttk.elte.hu](mailto:edit.matyus@ttk.elte.hu)

# I. MOLECULAR SYMMETRY GROUP OF THE METHANE DIMER

TABLE I. Character table of the molecular symmetry group of the methane dimer. The table was generated using the GAP program according to instructions of Ref. [1].

| $G_{576}^a$  | $\hat{E}$ | (14)(23) | (14)(23)(58)(67) | (243) | (243)(58)(67) | (243)(687) | (234)(687) | (34)(78)(9,10) | (1423)(78)(9,10) | (1423)(5867)(9,10) | (15)(26)(37)(48) | (1548)(2637) | (15)(264837) | (15)(26)(38)(47)(9,10) | (1547)(2638)(9,10) | (15)(264738)(9,10) | $g_{ns}^d$ |
|--------------|-----------|----------|------------------|-------|---------------|------------|------------|----------------|------------------|--------------------|------------------|--------------|--------------|------------------------|--------------------|--------------------|------------|
| $R^b$        | 1         | 2        | 3                | 4     | 5             | 6          | 7          | 8              | 9                | 10                 | 11               | 12           | 13           | 14                     | 15                 | 16                 |            |
| $K_R^c$      | 1         | 6        | 9                | 16    | 48            | 32         | 32         | 36             | 72               | 36                 | 12               | 36           | 96           | 12                     | 36                 | 96                 |            |
| $X_1(1)$     | 1         | 1        | 1                | 1     | 1             | 1          | 1          | 1              | 1                | 1                  | 1                | 1            | 1            | 1                      | 1                  | 1                  | 15         |
| $X_2(1)$     | 1         | 1        | 1                | 1     | 1             | 1          | 1          | -1             | -1               | -1                 | -1               | -1           | -1           | 1                      | 1                  | 1                  | 10         |
| $X_3(1)$     | 1         | 1        | 1                | 1     | 1             | 1          | 1          | -1             | -1               | -1                 | 1                | 1            | 1            | -1                     | -1                 | -1                 | 15         |
| $X_4(1)$     | 1         | 1        | 1                | 1     | 1             | 1          | 1          | 1              | 1                | 1                  | -1               | -1           | -1           | -1                     | -1                 | -1                 | 10         |
| $X_5(2)$     | 2         | 2        | 2                | -1    | -1            | 2          | -1         | .              | .                | .                  | .                | .            | .            | 2                      | 2                  | -1                 | 1          |
| $X_6(2)$     | 2         | 2        | 2                | -1    | -1            | 2          | -1         | .              | .                | .                  | .                | .            | .            | -2                     | -2                 | 1                  | 1          |
| $X_7(2)$     | 2         | 2        | 2                | -1    | -1            | -1         | 2          | .              | .                | .                  | -2               | -2           | 1            | .                      | .                  | .                  | 0          |
| $X_8(2)$     | 2         | 2        | 2                | -1    | -1            | -1         | 2          | .              | .                | .                  | 2                | 2            | -1           | .                      | .                  | .                  | 2          |
| $X_9(2)$     | 4         | 4        | 4                | 1     | 1             | -2         | -2         | .              | .                | .                  | .                | .            | .            | .                      | .                  | .                  | 10         |
| $X_{10}(6)$  | 6         | 2        | -2               | 3     | -1            | .          | .          | -2             | .                | 2                  | .                | .            | .            | .                      | .                  | .                  | 15         |
| $X_{11}(6)$  | 6         | 2        | -2               | 3     | -1            | .          | .          | 2              | .                | -2                 | .                | .            | .            | .                      | .                  | .                  | 15         |
| $X_{12}(9)$  | 9         | -3       | 1                | .     | .             | .          | .          | -1             | 1                | -1                 | -3               | 1            | .            | 3                      | -1                 | .                  | 3          |
| $X_{13}(9)$  | 9         | -3       | 1                | .     | .             | .          | .          | -1             | 1                | -1                 | 3                | -1           | .            | -3                     | 1                  | .                  | 6          |
| $X_{14}(9)$  | 9         | -3       | 1                | .     | .             | .          | .          | 1              | -1               | 1                  | -3               | 1            | .            | -3                     | 1                  | .                  | 3          |
| $X_{15}(9)$  | 9         | -3       | 1                | .     | .             | .          | .          | 1              | -1               | 1                  | 3                | -1           | .            | 3                      | -1                 | .                  | 6          |
| $X_{16}(12)$ | 12        | 4        | -4               | -3    | 1             | .          | .          | .              | .                | .                  | .                | .            | .            | .                      | .                  | .                  | 6          |

<sup>a</sup> Zero characters are labeled with “.” to enhance readability.

<sup>b</sup> Class index.

<sup>c</sup> Number of elements in class Cl.[ $R$ ].

<sup>d</sup> Spin statistical weight.

## II. $T_d(M)$ CHARACTER TABLE

TABLE II. Characters and irrep decomposition of the rotational functions of methane in the  $T_d(M)$  molecular symmetry group [2].

|         | $E$        | $(123)$                                                    | $(14)(23)$                                                  | $[(1423)]^*$                                                                       | $[(23)]^*$                                      | Irreps                               |
|---------|------------|------------------------------------------------------------|-------------------------------------------------------------|------------------------------------------------------------------------------------|-------------------------------------------------|--------------------------------------|
|         | 1          | 8                                                          | 3                                                           | 6                                                                                  | 6                                               |                                      |
| $j_k^M$ | $2j^M + 1$ | $\sum_{m=-j^M}^{j^M} D_{m,m}^{j^M*}(0, 0, \frac{2\pi}{3})$ | $\sum_{m=-j^M}^{j^M} D_{m,m}^{j^M*}(\frac{\pi}{3}, \pi, 0)$ | $\sum_{m=-j^M}^{j^M} D_{m,m}^{j^M*}(\frac{\pi}{6}, \frac{\pi}{2}, -\frac{\pi}{6})$ | $\sum_{m=-j^M}^{j^M} D_{m,m}^{j^M*}(0, \pi, 0)$ |                                      |
| 0       | 1          | 1                                                          | 1                                                           | 1                                                                                  | 1                                               | $A_1$                                |
| 1       | 3          | 0                                                          | -1                                                          | 1                                                                                  | -1                                              | $F_1$                                |
| 2       | 5          | -1                                                         | 1                                                           | -1                                                                                 | 1                                               | $E \oplus F_2$                       |
| 3       | 7          | 1                                                          | -1                                                          | -1                                                                                 | -1                                              | $A_2 \oplus F_1 \oplus F_2$          |
| 4       | 9          | 0                                                          | 1                                                           | 1                                                                                  | 1                                               | $A_1 \oplus E \oplus F_1 \oplus F_2$ |
| 5       | 11         | -1                                                         | -1                                                          | 1                                                                                  | -1                                              | $E \oplus 2F_1 \oplus F_2$           |

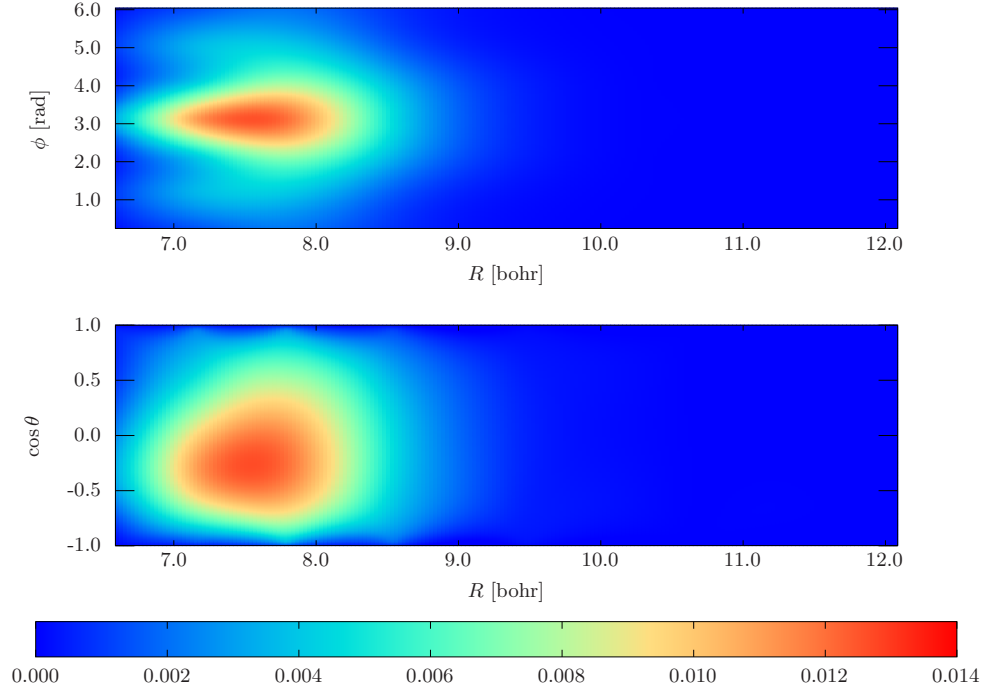

FIG. 1. 2D cut of the wave function of the ground state,  $[1,0]$ , of the ortho-meta spin isomer corresponding to the J0.2 (from the 6-fold degenerate J0.2–7) state (Table V).

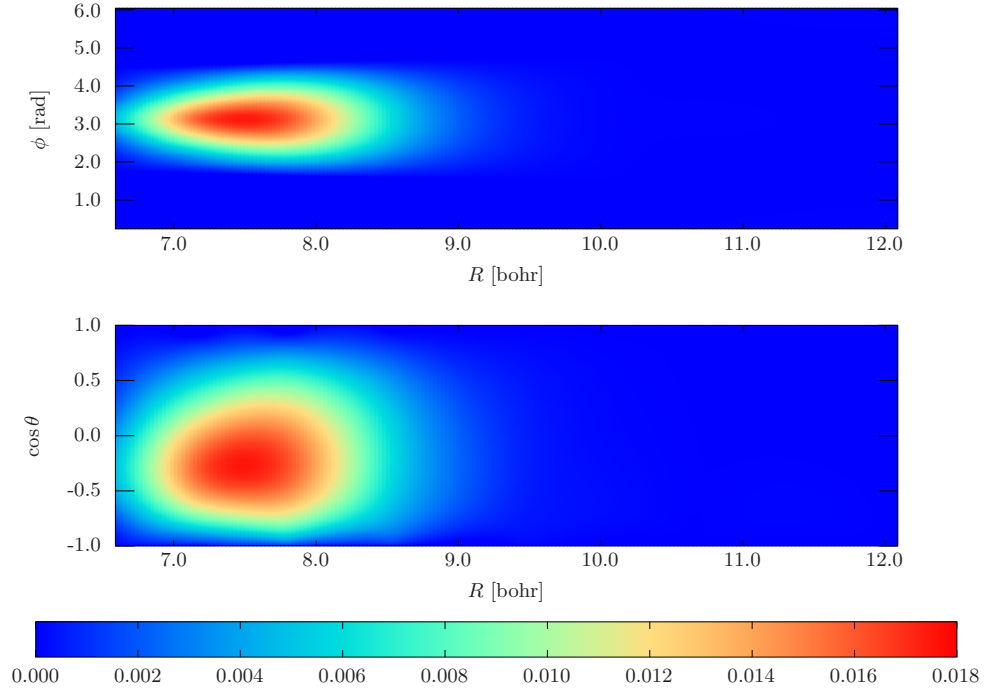

FIG. 2. 2D cut of the wave function of the ground state,  $[1,1]$ , of the ortho-ortho spin isomer corresponding to the J0.8 (from the 9-fold degenerate J0.8–16) state (Table V).

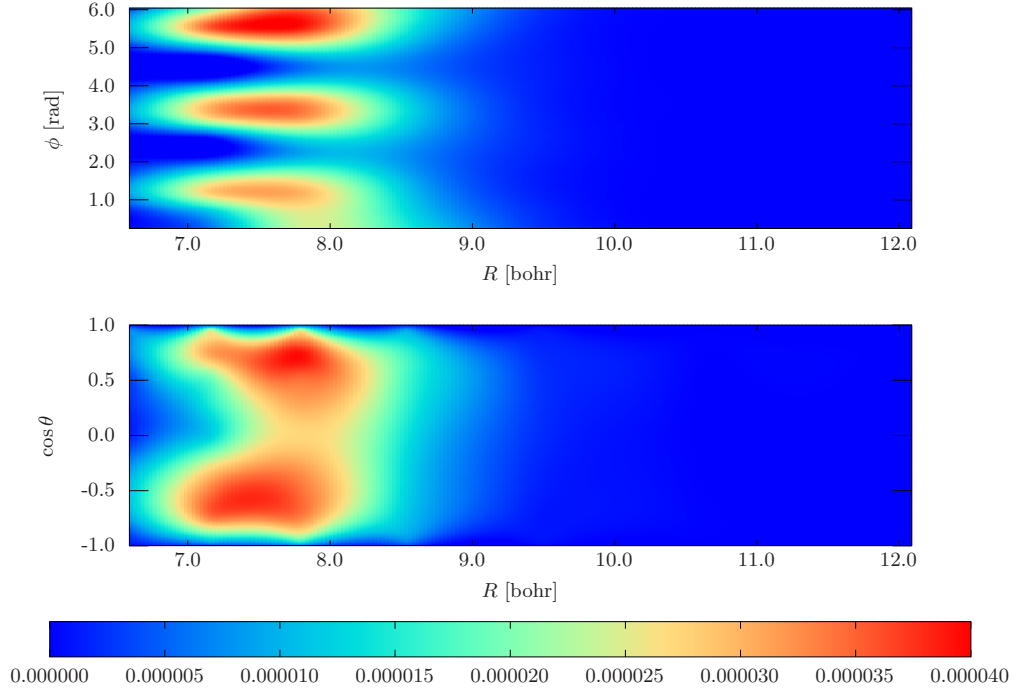

FIG. 3. 2D cut of the wave function of the ground state,  $[2, 0]$ , of the meta-para spin isomer corresponding to the J1.83 (from the 4-fold degenerate J1.83–86) state (Table V).

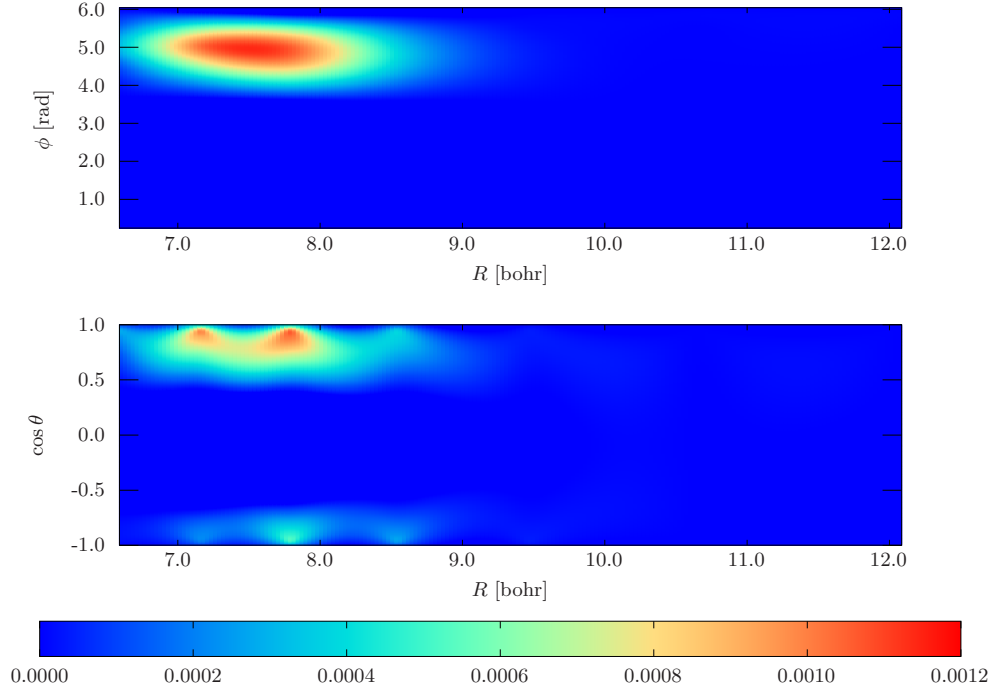

FIG. 4. 2D cut of the wave function of the ground state,  $[2, 1]$ , of the ortho-para spin isomer corresponding to the J1.93 (from the 12-fold degenerate J1.93–104) state (Table V).

TABLE III.  $U_{\omega\sigma,\alpha}^{(\Omega)}$  matrix elements for  $\Omega = 2$ .

| $(\omega, \sigma)$ | $\alpha$ : | $xx$                  | $xy$           | $xz$           | $yy$                  | $yz$           | $zz$                  |
|--------------------|------------|-----------------------|----------------|----------------|-----------------------|----------------|-----------------------|
| (0,0)              |            | $-\frac{1}{\sqrt{3}}$ | 0              | 0              | $-\frac{1}{\sqrt{3}}$ | 0              | $-\frac{1}{\sqrt{3}}$ |
| (2,-2)             |            | $\frac{1}{2}$         | $-\frac{i}{2}$ | 0              | $-\frac{1}{2}$        | 0              | 0                     |
| (2,-1)             |            | 0                     | 0              | $\frac{1}{2}$  | 0                     | $-\frac{i}{2}$ | 0                     |
| (2,0)              |            | $-\frac{1}{\sqrt{6}}$ | 0              | 0              | $-\frac{1}{\sqrt{6}}$ | 0              | $\sqrt{\frac{2}{3}}$  |
| (2,1)              |            | 0                     | 0              | $-\frac{1}{2}$ | 0                     | $-\frac{i}{2}$ | 0                     |
| (2,2)              |            | $\frac{1}{2}$         | $\frac{i}{2}$  | 0              | $-\frac{1}{2}$        | 0              | 0                     |

TABLE IV.  $[U_{\omega\sigma,\alpha}^{(\Omega)}]^{-1}$  matrix elements for  $\Omega = 2$ .

| $\alpha$ | $(\omega, \sigma)$ : | (0,0)                 | (2,-2)         | (2,-1)        | (2,0)                 | (2,1)         | (2,2)          |
|----------|----------------------|-----------------------|----------------|---------------|-----------------------|---------------|----------------|
| $xx$     |                      | $-\frac{1}{\sqrt{3}}$ | $\frac{1}{2}$  | 0             | $-\frac{1}{\sqrt{6}}$ | 0             | $\frac{1}{2}$  |
| $xy$     |                      | 0                     | $\frac{i}{2}$  | 0             | 0                     | 0             | $-\frac{i}{2}$ |
| $xz$     |                      | 0                     | 0              | $\frac{1}{2}$ | 0                     | $\frac{1}{2}$ | 0              |
| $yy$     |                      | $-\frac{1}{\sqrt{3}}$ | $-\frac{1}{2}$ | 0             | $-\frac{1}{\sqrt{6}}$ | 0             | $-\frac{1}{2}$ |
| $yz$     |                      | 0                     | 0              | $\frac{i}{2}$ | 0                     | $\frac{i}{2}$ | 0              |
| $zz$     |                      | $-\frac{1}{\sqrt{3}}$ | 0              | 0             | $\sqrt{\frac{2}{3}}$  | 0             | 0              |

TABLE V. Computed  $J = 0$  and  $J = 1$  rovibrational states of the  $(\text{CH}_4)_2$ . The energies are referenced to the ZPVE ( $94.25 \text{ cm}^{-1}$ ).

| Label   | $\tilde{\nu}$ [ $\text{cm}^{-1}$ ] | Assignment                             | Symm.        | Label   | $\tilde{\nu}$ [ $\text{cm}^{-1}$ ] | Assignment                             | Symm.        |
|---------|------------------------------------|----------------------------------------|--------------|---------|------------------------------------|----------------------------------------|--------------|
| $J0.n$  |                                    |                                        |              | $J1.n$  |                                    |                                        |              |
| 1       | 0.00                               | $[[0, 0]_0, 0]_{00}$                   | $X_1(1)$     | 1       | 0.24                               | $[[0, 0]_0, 1]_{10}$                   | $X_2(1)$     |
| 2-7     | 8.99                               | $[[1, 0]_1, 1]_{00}$                   | $X_{11}(6)$  | 2-7     | 9.12                               | $[[1, 0]_1, 0]_{10}$                   | $X_{10}(6)$  |
| 8-16    | 18.04                              | $[[1, 1]_L, L]_{00}$ ( $L = 0, 2$ )    | $X_{15}(9)$  | 8-13    | 9.80                               | $[[1, 0]_1, 1]_{10}$                   | $X_{11}(6)$  |
| 17-25   | 19.32                              | $[[1, 1]_1, 1]_{00}$                   | $X_{12}(9)$  | 14-19   | 9.91                               | $[[1, 0]_1, 2]_{10}$                   | $X_{10}(6)$  |
| 26-34   | 19.37                              | $[[1, 1]_L, L]_{00}$ ( $L = 0, 2$ )    | $X_{15}(9)$  | 20-28   | 18.10                              | $[[1, 1]_0, 1]_{10}$                   | $X_{12}(9)$  |
| 35-40   | 31.43                              | $[[2, 0]_2, 2]_{00}$                   | $X_{11}(6)$  | 29-37   | 18.65                              | $[[1, 1]_1, 0]_{10}$                   | $X_{15}(9)$  |
| 41-44   | 31.73                              | $[[2, 0]_2, 2]_{00}$                   | $X_9(2)$     | 38-46   | 18.74                              | $[[1, 1]_2, 1]_{10}$                   | $X_{12}(9)$  |
| 45-56   | 32.17                              | $[[2, 1]_L, L]_{00}$ ( $L = 1, 2, 3$ ) | $X_{16}(12)$ | 47-55   | 18.90                              | $[[1, 1]_1, 2]_{10}$                   | $X_{15}(9)$  |
| 57      | 32.93                              | $[[0, 0]_0, 0]_{00}$                   | $X_1(1)$     | 56-64   | 18.95                              | $[[1, 1]_1, 1]_{10}$                   | $X_{12}(9)$  |
| 58-66   | 38.44                              | $[[2, 1]_3, 3]_{00}$                   | $X_{14}(9)$  | 65-73   | 19.64                              | $[[1, 1]_2, 2]_{10}$                   | $X_{15}(9)$  |
| 67-75   | 38.88                              | $[[2, 1]_1, 1]_{00}$                   | $X_{15}(9)$  | 74-82   | 19.74                              | $[[1, 1]_2, 3]_{10}$                   | $X_{12}(9)$  |
| 76-84   | 40.47                              | $[[2, 1]_2, 2]_{00}$                   | $X_{12}(9)$  | 83-86   | 22.52                              | $[[2, 0]_2, L]_{10}$ ( $L = 1, 2, 3$ ) | $X_9(2)$     |
| 85-96   | 40.52                              | $[[2, 1]_L, L]_{00}$ ( $L = 1, 2, 3$ ) | $X_{16}(12)$ | 87-92   | 31.29                              | $[[2, 0]_2, 1]_{10}$                   | $X_{10}(6)$  |
| 97-105  | 42.19                              | $[[2, 1]_2, 2]_{00}$                   | $X_{12}(9)$  | 93-104  | 31.67                              | $[[2, 1]_j, \Lambda]_{10}$ (mixed)     | $X_{16}(12)$ |
| 106-114 | 42.43                              | $[[2, 1]_1, 1]_{00}$                   | $X_{14}(9)$  | 105-110 | 31.82                              | $[[2, 0]_2, 2]_{10}$                   | $X_{11}(6)$  |
| 115-123 | 43.57                              | $[[2, 1]_3, 3]_{00}$                   | $X_{15}(9)$  | 111-114 | 31.97                              | $[[2, 0]_2, L]_{10}$ ( $L = 1, 2, 3$ ) | $X_9(2)$     |
| 124-129 | 45.14                              | $[[1, 0]_1, 1]_{00}$                   | $X_{11}(6)$  | 115-120 | 32.20                              | $[[2, 0]_2, 3]_{10}$                   | $X_{10}(6)$  |
|         |                                    |                                        |              | 121-132 | 32.45                              | $[[2, 1]_j, \Lambda]_{10}$ (mixed)     | $X_{16}(12)$ |
|         |                                    |                                        |              | 133     | 33.15                              | $[[0, 0]_0, 1]_{10}$                   | $X_2(1)$     |

TABLE VI. Computed  $J = 2$  and  $J = 3$  rovibrational states of the  $(\text{CH}_4)_2$ . The energies are referenced to the ZPVE ( $94.25 \text{ cm}^{-1}$ ).

| Label   | $\tilde{\nu}$ [ $\text{cm}^{-1}$ ] | Assignment                                   | Symm.        | Label   | $\tilde{\nu}$ [ $\text{cm}^{-1}$ ] | Assignment                             | Symm.        |
|---------|------------------------------------|----------------------------------------------|--------------|---------|------------------------------------|----------------------------------------|--------------|
| $J2.n$  |                                    |                                              |              | $J3.n$  |                                    |                                        |              |
| 1       | 0.73                               | $[[0, 0]_0, 2]_{20}$                         | $X_1(1)$     | 1       | 1.49                               | $[[0, 0]_0, 3]_{30}$                   | $X_2(1)$     |
| 2–7     | 9.44                               | $[[1, 0]_1, 1]_{20}$                         | $X_{11}(6)$  | 2–7     | 10.00                              | $[[1, 0]_1, 2]_{30}$                   | $X_{10}(6)$  |
| 8–13    | 10.29                              | $[[1, 0]_1, 2]_{20}$                         | $X_{10}(6)$  | 8–13    | 11.02                              | $[[1, 0]_1, 3]_{30}$                   | $X_{11}(6)$  |
| 14–19   | 10.55                              | $[[1, 0]_1, 3]_{20}$                         | $X_{11}(6)$  | 14–19   | 11.46                              | $[[1, 0]_1, 4]_{30}$                   | $X_{10}(6)$  |
| 20–28   | 18.28                              | $[[1, 1]_2, 0]_{20}$                         | $X_{15}(9)$  | 20–28   | 18.66                              | $[[1, 1]_2, 1]_{30}$                   | $X_{12}(9)$  |
| 29–37   | 19.01                              | $[[1, 1]_1, 1]_{20}$                         | $X_{12}(9)$  | 29–37   | 19.58                              | $[[1, 1]_2, 2]_{30}$                   | $X_{15}(9)$  |
| 38–46   | 19.10                              | $[[1, 1]_2, 1]_{20}$                         | $X_{12}(9)$  | 38–46   | 19.61                              | $[[1, 1]_1, 2]_{30}$                   | $X_{15}(9)$  |
| 47–55   | 19.22                              | $[[1, 1]_0, 2]_{20}$                         | $X_{15}(9)$  | 47–55   | 19.95                              | $[[1, 1]_0, 3]_{30}$                   | $X_{12}(9)$  |
| 56–64   | 19.31                              | $[[1, 1]_1, 2]_{20}$                         | $X_{15}(9)$  | 56–64   | 20.00                              | $[[1, 1]_1, 3]_{30}$                   | $X_{12}(9)$  |
| 65–73   | 19.80                              | $[[1, 1]_2, 2]_{20}$                         | $X_{15}(9)$  | 65–73   | 20.57                              | $[[1, 1]_2, 3]_{30}$                   | $X_{12}(9)$  |
| 74–82   | 19.92                              | $[[1, 1]_1, 3]_{20}$                         | $X_{12}(9)$  | 74–82   | 20.58                              | $[[1, 1]_2, 4]_{30}$                   | $X_{15}(9)$  |
| 83–91   | 20.27                              | $[[1, 1]_2, 3]_{20}$                         | $X_{12}(9)$  | 83–91   | 21.16                              | $[[1, 1]_1, 4]_{30}$                   | $X_{15}(9)$  |
| 92–100  | 20.50                              | $[[1, 1]_2, 4]_{20}$                         | $X_{15}(9)$  | 92–100  | 21.58                              | $[[1, 1]_2, 5]_{30}$                   | $X_{12}(9)$  |
| 101–104 | 22.98                              | $[[2, 0]_2, L]_{20}$ ( $L = 0, 1, 2, 3, 4$ ) | $X_9(2)$     | 101–104 | 23.66                              | $[[2, 0]_2, L]_{30}$ ( $L = 1, 2, 4$ ) | $X_9(2)$     |
| 105–108 | 26.68                              | $[[2, 0]_2, L]_{20}$ ( $L = 0, 1, 2, 3, 4$ ) | $X_9(2)$     | 105–108 | 27.40                              | $[[2, 0]_2, L]_{30}$ ( $L = 2, 3$ )    | $X_9(2)$     |
| 109–114 | 29.86                              | $[[2, 0]_2, 0]_{20}$                         | $X_{11}(6)$  | 109–114 | 30.46                              | $[[2, 0]_2, 1]_{30}$                   | $X_{10}(6)$  |
| 115–120 | 29.87                              | $[[2, 0]_2, 1]_{20}$                         | $X_{10}(6)$  | 115–120 | 30.50                              | $[[2, 0]_2, 2]_{30}$                   | $X_{11}(6)$  |
| 121–126 | 31.54                              | $[[2, 0]_2, 2]_{20}$                         | $X_{11}(6)$  | 121–126 | 32.03                              | $[[2, 0]_2, 3]_{30}$                   | $X_{10}(6)$  |
| 127–138 | 31.93                              | $[[2, 1]_j, \Lambda]_{20}$ (mixed)           | $X_{16}(12)$ | 127–138 | 32.40                              | $[[2, 1]_j, \Lambda]_{30}$ (mixed)     | $X_{16}(12)$ |
| 139–144 | 32.38                              | $[[2, 0]_2, 3]_{20}$                         | $X_{10}(6)$  | 139–142 | 33.14                              | $[[2, 0]_2, L]_{30}$ ( $L = 1, 3, 5$ ) | $X_9(2)$     |
| 145–148 | 32.42                              | $[[2, 0]_2, 4]_{20}$                         | $X_9(2)$     | 143–148 | 33.20                              | $[[2, 0]_2, 4]_{30}$                   | $X_{11}(6)$  |
| 149–160 | 32.54                              | $[[2, 1]_j, \Lambda]_{20}$ (mixed)           | $X_{16}(12)$ | 149–160 | 33.27                              | $[[2, 1]_j, \Lambda]_{30}$ (mixed)     | $X_{16}(12)$ |
| 161–172 | 33.04                              | $[[2, 1]_j, \Lambda]_{20}$ (mixed)           | $X_{16}(12)$ | 161     | 33.85                              | $[[0, 0]_0, 3]_{30}$                   | $X_2(1)$     |
| 173–178 | 33.06                              | $[[2, 0]_2, 4]_{20}$                         | $X_{11}(6)$  | 162–173 | 33.87                              | $[[2, 1]_j, \Lambda]_{30}$ (mixed)     | $X_{16}(12)$ |
| 179     | 33.19                              | $[[0, 0]_0, 2]_{20}$                         | $X_1(1)$     | 174–179 | 34.13                              | $[[2, 0]_2, 5]_{30}$                   | $X_{10}(6)$  |
| 180–191 | 35.72                              | $[[2, 1]_j, \Lambda]_{20}$ (mixed)           | $X_{16}(12)$ | 180–191 | 36.12                              | $[[2, 1]_j, \Lambda]_{30}$ (mixed)     | $X_{16}(12)$ |
| 192–195 | 36.02                              | $[[2, 0]_2, L]_{20}$ ( $L = 0, 1, 2$ )       | $X_9(2)$     | 192–195 | 36.75                              | $[[2, 0]_2, L]_{30}$ ( $L = 1, 2, 3$ ) | $X_9(2)$     |
| 196–207 | 36.74                              | $[[2, 1]_j, \Lambda]_{20}$ (mixed)           | $X_{16}(12)$ | 196–207 | 36.81                              | $[[2, 1]_j, \Lambda]_{30}$ (mixed)     | $X_{16}(12)$ |
| 208–216 | 38.44                              | $[[2, 1]_j, \Lambda]_{20}$ (mixed)           | $X_{15}(9)$  | 208–219 | 37.59                              | $[[2, 1]_j, \Lambda]_{30}$ (mixed)     | $X_{16}(12)$ |
| 217–225 | 38.46                              | $[[2, 1]_j, \Lambda]_{20}$ (mixed)           | $X_{12}(9)$  | 220–228 | 38.84                              | $[[2, 1]_j, \Lambda]_{30}$ (mixed)     | $X_{12}(9)$  |
| 226–234 | 38.53                              | $[[2, 1]_j, \Lambda]_{20}$ (mixed)           | $X_{15}(9)$  | 229–237 | 38.84                              | $[[2, 1]_j, \Lambda]_{30}$ (mixed)     | $X_{12}(9)$  |
| 235–243 | 38.60                              | $[[2, 1]_j, \Lambda]_{20}$ (mixed)           | $X_{12}(9)$  | 238–246 | 38.92                              | $[[2, 1]_j, \Lambda]_{30}$ (mixed)     | $X_{15}(9)$  |
| 244–252 | 38.84                              | $[[2, 1]_j, \Lambda]_{20}$ (mixed)           | $X_{15}(9)$  | 247–255 | 38.97                              | $[[2, 1]_j, \Lambda]_{30}$ (mixed)     | $X_{15}(9)$  |
| 253–261 | 39.22                              | $[[2, 1]_j, \Lambda]_{20}$ (mixed)           | $X_{15}(9)$  | 259–264 | 39.38                              | $[[2, 1]_j, \Lambda]_{30}$ (mixed)     | $X_{12}(9)$  |
| 262–270 | 39.32                              | $[[2, 1]_j, \Lambda]_{20}$ (mixed)           | $X_{15}(9)$  | 265–273 | 39.55                              | $[[2, 1]_j, \Lambda]_{30}$ (mixed)     | $X_{12}(9)$  |
| 271–279 | 39.35                              | $[[2, 1]_j, \Lambda]_{20}$ (mixed)           | $X_{12}(9)$  | 274–282 | 39.56                              | $[[2, 1]_j, \Lambda]_{30}$ (mixed)     | $X_{15}(9)$  |
| 280–288 | 39.80                              | $[[2, 1]_j, \Lambda]_{20}$ (mixed)           | $X_{12}(9)$  | 283–291 | 39.75                              | $[[2, 1]_j, \Lambda]_{30}$ (mixed)     | $X_{12}(9)$  |
| 289–297 | 39.99                              | $[[2, 1]_j, \Lambda]_{20}$ (mixed)           | $X_{12}(9)$  | 292–300 | 40.01                              | $[[2, 1]_j, \Lambda]_{30}$ (mixed)     | $X_{12}(9)$  |
| 298–306 | 40.13                              | $[[2, 1]_j, \Lambda]_{20}$ (mixed)           | $X_{15}(9)$  | 301–309 | 40.04                              | $[[2, 1]_j, \Lambda]_{30}$ (mixed)     | $X_{15}(9)$  |
| 307–315 | 40.21                              | $[[2, 1]_j, \Lambda]_{20}$ (mixed)           | $X_{15}(9)$  | 310–318 | 40.06                              | $[[2, 1]_j, \Lambda]_{30}$ (mixed)     | $X_{12}(9)$  |
| 316–324 | 40.43                              | $[[2, 1]_j, \Lambda]_{20}$ (mixed)           | $X_{12}(9)$  | 319–327 | 40.14                              | $[[2, 1]_j, \Lambda]_{30}$ (mixed)     | $X_{15}(9)$  |
| 325–333 | 40.64                              | $[[2, 1]_j, \Lambda]_{20}$ (mixed)           | $X_{15}(9)$  | 328–336 | 40.57                              | $[[2, 1]_j, \Lambda]_{30}$ (mixed)     | $X_{15}(9)$  |
| 334–345 | 40.96                              | $[[2, 1]_j, \Lambda]_{20}$ (mixed)           | $X_{16}(12)$ | 337–345 | 40.58                              | $[[2, 1]_j, \Lambda]_{30}$ (mixed)     | $X_{15}(9)$  |
| 346–349 | 41.15                              | $[[2, 0]_2, L]_{20}$ ( $L = 3, 4$ )          | $X_9(2)$     | 346–354 | 40.80                              | $[[2, 1]_j, \Lambda]_{30}$ (mixed)     | $X_{12}(9)$  |
| 350–358 | 41.20                              | $[[2, 1]_j, \Lambda]_{20}$ (mixed)           | $X_{12}(9)$  | 355–363 | 40.97                              | $[[2, 1]_j, \Lambda]_{30}$ (mixed)     | $X_{15}(9)$  |
|         |                                    |                                              |              | 364–372 | 41.12                              | $[[2, 1]_j, \Lambda]_{30}$ (mixed)     | $X_{12}(9)$  |
|         |                                    |                                              |              | 373–381 | 41.38                              | $[[2, 1]_j, \Lambda]_{30}$ (mixed)     | $X_{12}(9)$  |



TABLE VII. Computed  $J = 4, 5$ , and 6 rovibrational states of the  $(\text{CH}_4)_2$ . The energies are referenced to the ZPVE ( $94.25 \text{ cm}^{-1}$ ).

| Label       | $\tilde{\nu}[\text{cm}^{-1}]$ | Assignment                                                      | Symm.                | Label       | $\tilde{\nu}[\text{cm}^{-1}]$ | Assignment                                               | Symm.                |
|-------------|-------------------------------|-----------------------------------------------------------------|----------------------|-------------|-------------------------------|----------------------------------------------------------|----------------------|
| <i>J4.n</i> |                               |                                                                 |                      | <i>J5.n</i> |                               |                                                          |                      |
| 1           | 2.43                          | [[0, 0] <sub>0</sub> , 4] <sub>40</sub>                         | X <sub>1</sub> (1)   | 1           | 3.65                          | [[0, 0] <sub>0</sub> , 5] <sub>50</sub>                  | X <sub>2</sub> (1)   |
| 2–7         | 10.79                         | [[1, 0] <sub>1</sub> , 3] <sub>40</sub>                         | X <sub>11</sub> (6)  | 2–7         | 11.82                         | [[1, 0] <sub>1</sub> , 4] <sub>50</sub>                  | X <sub>10</sub> (6)  |
| 8–13        | 12.00                         | [[1, 0] <sub>1</sub> , 4] <sub>40</sub>                         | X <sub>10</sub> (6)  | 8–13        | 13.21                         | [[1, 0] <sub>1</sub> , 5] <sub>50</sub>                  | X <sub>11</sub> (6)  |
| 14–19       | 12.61                         | [[1, 0] <sub>1</sub> , 5] <sub>40</sub>                         | X <sub>11</sub> (6)  | 14–19       | 14.01                         | [[1, 0] <sub>1</sub> , 6] <sub>50</sub>                  | X <sub>10</sub> (6)  |
| 20–28       | 19.25                         | [[1, 1] <sub>2</sub> , 2] <sub>40</sub>                         | X <sub>15</sub> (9)  | 20–28       | 20.09                         | [[1, 1] <sub>2</sub> , 3] <sub>50</sub>                  | X <sub>12</sub> (9)  |
| 29–37       | 20.38                         | [[1, 1] <sub>1</sub> , 3] <sub>40</sub>                         | X <sub>12</sub> (9)  | 29–37       | 21.39                         | [[1, 1] <sub>1</sub> , 4] <sub>50</sub>                  | X <sub>15</sub> (9)  |
| 38–46       | 20.38                         | [[1, 1] <sub>2</sub> , 3] <sub>40</sub>                         | X <sub>12</sub> (9)  | 38–46       | 21.42                         | [[1, 1] <sub>2</sub> , 4] <sub>50</sub>                  | X <sub>15</sub> (9)  |
| 47–55       | 20.92                         | [[1, 1] <sub>0</sub> , 4] <sub>40</sub>                         | X <sub>15</sub> (9)  | 47–55       | 22.13                         | [[1, 1] <sub>0</sub> , 5] <sub>50</sub>                  | X <sub>12</sub> (9)  |
| 56–64       | 20.95                         | [[1, 1] <sub>1</sub> , 4] <sub>40</sub>                         | X <sub>15</sub> (9)  | 56–64       | 22.15                         | [[1, 1] <sub>1</sub> , 5] <sub>50</sub>                  | X <sub>12</sub> (9)  |
| 65–73       | 21.57                         | [[1, 1] <sub>2</sub> , 4] <sub>40</sub>                         | X <sub>15</sub> (9)  | 65–73       | 22.80                         | [[1, 1] <sub>2</sub> , 5] <sub>50</sub>                  | X <sub>12</sub> (9)  |
| 74–82       | 22.05                         | [[1, 1] <sub>2</sub> , 5] <sub>40</sub>                         | X <sub>12</sub> (9)  | 74–82       | 23.47                         | [[1, 1] <sub>2</sub> , 6] <sub>50</sub>                  | X <sub>15</sub> (9)  |
| 83–91       | 22.30                         | [[1, 1] <sub>1</sub> , 5] <sub>40</sub>                         | X <sub>12</sub> (9)  | 83–91       | 23.70                         | [[1, 1] <sub>1</sub> , 6] <sub>50</sub>                  | X <sub>15</sub> (9)  |
| 92–100      | 22.92                         | [[1, 1] <sub>2</sub> , 6] <sub>40</sub>                         | X <sub>15</sub> (9)  | 92–100      | 24.51                         | [[1, 1] <sub>2</sub> , 7] <sub>50</sub>                  | X <sub>12</sub> (9)  |
| 101–104     | 24.56                         | [[2, 0] <sub>2</sub> , L] <sub>40</sub> ( $L = 2, 3, 4, 5, 6$ ) | X <sub>9</sub> (2)   | 101–104     | 25.69                         | [[2, 0] <sub>2</sub> , L] <sub>50</sub> ( $L = 3, 6$ )   | X <sub>9</sub> (2)   |
| 105–108     | 28.36                         | [[2, 0] <sub>2</sub> , L] <sub>40</sub> ( $L = 2, 3, 4, 5, 6$ ) | X <sub>9</sub> (2)   | 105–108     | 29.56                         | [[2, 0] <sub>2</sub> , L] <sub>40</sub> ( $L = 4, 5$ )   | X <sub>9</sub> (2)   |
| 109–114     | 31.25                         | [[2, 0] <sub>2</sub> , 2] <sub>40</sub>                         | X <sub>11</sub> (6)  | 109–114     | 32.22                         | [[2, 0] <sub>2</sub> , 3] <sub>50</sub>                  | X <sub>10</sub> (6)  |
| 115–120     | 31.34                         | [[2, 0] <sub>2</sub> , 3] <sub>40</sub>                         | X <sub>10</sub> (6)  | 115–120     | 32.41                         | [[2, 0] <sub>2</sub> , 4] <sub>50</sub>                  | X <sub>11</sub> (6)  |
| 121–126     | 32.80                         | [[2, 0] <sub>2</sub> , 4] <sub>40</sub>                         | X <sub>11</sub> (6)  | 121–126     | 33.87                         | [[2, 0] <sub>2</sub> , 5] <sub>50</sub>                  | X <sub>10</sub> (6)  |
| 127–138     | 33.10                         | [[2, 1] <sub>j</sub> , $\Lambda$ ] <sub>40</sub> (mixed)        | X <sub>16</sub> (12) | 127–138     | 34.03                         | [[2, 1] <sub>j</sub> , $\Lambda$ ] <sub>50</sub> (mixed) | X <sub>16</sub> (12) |
| 139–142     | 34.10                         | [[2, 0] <sub>2</sub> , L] <sub>40</sub> ( $L = 2, 4, 6$ )       | X <sub>9</sub> (2)   | 139–142     | 35.31                         | [[2, 0] <sub>2</sub> , 7] <sub>50</sub>                  | X <sub>9</sub> (2)   |
| 143–154     | 34.20                         | [[2, 1] <sub>j</sub> , $\Lambda$ ] <sub>40</sub> (mixed)        | X <sub>16</sub> (12) | <i>J6.n</i> |                               |                                                          |                      |
| 155–160     | 34.29                         | [[2, 0] <sub>2</sub> , 5] <sub>40</sub>                         | X <sub>10</sub> (6)  | 1           | 5.10                          | [[0, 0] <sub>0</sub> , 6] <sub>60</sub>                  | X <sub>1</sub> (1)   |
| 161         | 34.74                         | [[0, 0] <sub>0</sub> , 4] <sub>40</sub>                         | X <sub>1</sub> (1)   | 2–7         | 13.08                         | [[1, 0] <sub>1</sub> , 5] <sub>60</sub>                  | X <sub>11</sub> (6)  |
| 162–173     | 34.94                         | [[2, 1] <sub>j</sub> , $\Lambda$ ] <sub>40</sub> (mixed)        | X <sub>16</sub> (12) | 8–13        | 14.68                         | [[1, 0] <sub>1</sub> , 6] <sub>60</sub>                  | X <sub>10</sub> (6)  |
| 174–179     | 35.42                         | [[2, 0] <sub>2</sub> , 5] <sub>40</sub>                         | X <sub>11</sub> (6)  | 14–19       | 15.65                         | [[1, 0] <sub>1</sub> , 7] <sub>60</sub>                  | X <sub>11</sub> (6)  |
| 180–191     | 36.86                         | [[2, 1] <sub>j</sub> , $\Lambda$ ] <sub>40</sub> (mixed)        | X <sub>16</sub> (12) | 20–28       | 21.16                         | [[1, 1] <sub>2</sub> , 4] <sub>60</sub>                  | X <sub>15</sub> (9)  |
| 192–195     | 37.73                         | [[2, 0] <sub>2</sub> , L] <sub>40</sub> ( $L = 3, 4, 5$ )       | X <sub>9</sub> (2)   | 29–37       | 22.65                         | [[1, 1] <sub>1</sub> , 5] <sub>60</sub>                  | X <sub>12</sub> (9)  |
| 196–207     | 37.84                         | [[2, 1] <sub>j</sub> , $\Lambda$ ] <sub>40</sub> (mixed)        | X <sub>16</sub> (12) | 38–46       | 22.69                         | [[1, 1] <sub>2</sub> , 5] <sub>60</sub>                  | X <sub>12</sub> (9)  |
| 208–219     | 38.71                         | [[2, 1] <sub>j</sub> , $\Lambda$ ] <sub>40</sub> (mixed)        | X <sub>16</sub> (12) | 47–55       | 23.58                         | [[1, 1] <sub>1</sub> , 6] <sub>60</sub>                  | X <sub>15</sub> (9)  |
| 220–228     | 39.38                         | [[2, 1] <sub>j</sub> , $\Lambda$ ] <sub>40</sub> (mixed)        | X <sub>15</sub> (9)  | 56–64       | 23.60                         | [[1, 1] <sub>0</sub> , 6] <sub>60</sub>                  | X <sub>15</sub> (9)  |
| 229–237     | 39.43                         | [[2, 1] <sub>j</sub> , $\Lambda$ ] <sub>40</sub> (mixed)        | X <sub>15</sub> (9)  | 65–73       | 24.27                         | [[1, 1] <sub>2</sub> , 6] <sub>60</sub>                  | X <sub>15</sub> (9)  |
| 238–246     | 39.59                         | [[2, 1] <sub>j</sub> , $\Lambda$ ] <sub>40</sub> (mixed)        | X <sub>12</sub> (9)  | 74–82       | 25.13                         | [[1, 1] <sub>2</sub> , 7] <sub>60</sub>                  | X <sub>12</sub> (9)  |
| 247–255     | 39.61                         | [[2, 1] <sub>j</sub> , $\Lambda$ ] <sub>40</sub> (mixed)        | X <sub>12</sub> (9)  | 83–91       | 25.34                         | [[1, 1] <sub>1</sub> , 7] <sub>60</sub>                  | X <sub>12</sub> (9)  |
| 256–264     | 40.14                         | [[2, 1] <sub>j</sub> , $\Lambda$ ] <sub>40</sub> (mixed)        | X <sub>15</sub> (9)  | 92–100      | 26.35                         | [[1, 1] <sub>2</sub> , 8] <sub>60</sub>                  | X <sub>15</sub> (9)  |
| 265–273     | 40.42                         | [[2, 1] <sub>j</sub> , $\Lambda$ ] <sub>40</sub> (mixed)        | X <sub>15</sub> (9)  | 101–104     | 27.04                         | [[2, 0] <sub>2</sub> , 2] <sub>60</sub>                  | X <sub>9</sub> (2)   |
| 274–282     | 40.43                         | [[2, 1] <sub>j</sub> , $\Lambda$ ] <sub>40</sub> (mixed)        | X <sub>12</sub> (9)  | 105–108     | 31.00                         | [[2, 0] <sub>2</sub> , L] <sub>60</sub> ( $L = 3, 4$ )   | X <sub>9</sub> (2)   |
| 283–291     | 40.52                         | [[2, 1] <sub>j</sub> , $\Lambda$ ] <sub>40</sub> (mixed)        | X <sub>15</sub> (9)  | 109–114     | 33.39                         | [[2, 0] <sub>2</sub> , 2] <sub>60</sub>                  | X <sub>11</sub> (6)  |
| 292–300     | 40.84                         | [[2, 1] <sub>j</sub> , $\Lambda$ ] <sub>40</sub> (mixed)        | X <sub>15</sub> (9)  | 115–120     | 33.71                         | [[2, 0] <sub>2</sub> , 3] <sub>60</sub>                  | X <sub>10</sub> (6)  |
| 301–309     | 40.91                         | [[2, 1] <sub>j</sub> , $\Lambda$ ] <sub>40</sub> (mixed)        | X <sub>12</sub> (9)  | 121–132     | 35.18                         | [[2, 1] <sub>j</sub> , $\Lambda$ ] <sub>60</sub> (mixed) | X <sub>16</sub> (12) |
| 310–318     | 41.03                         | [[2, 1] <sub>j</sub> , $\Lambda$ ] <sub>40</sub> (mixed)        | X <sub>15</sub> (9)  | 133–138     | 35.22                         | [[2, 0] <sub>2</sub> , 4] <sub>60</sub>                  | X <sub>11</sub> (6)  |
| 319–327     | 41.07                         | [[2, 1] <sub>j</sub> , $\Lambda$ ] <sub>40</sub> (mixed)        | X <sub>12</sub> (9)  | 139–150     | 36.70                         | [[2, 1] <sub>j</sub> , $\Lambda$ ] <sub>60</sub> (mixed) | X <sub>16</sub> (12) |
| 328–336     | 41.45                         | [[2, 1] <sub>j</sub> , $\Lambda$ ] <sub>40</sub> (mixed)        | X <sub>12</sub> (9)  | 151–154     | 36.75                         | [[2, 0] <sub>2</sub> , L] <sub>60</sub> ( $L = 4, 6$ )   | X <sub>9</sub> (2)   |
| 337–345     | 41.54                         | [[2, 1] <sub>j</sub> , $\Lambda$ ] <sub>40</sub> (mixed)        | X <sub>12</sub> (9)  | 155         | 37.17                         | [[0, 0] <sub>0</sub> , 6] <sub>60</sub>                  | X <sub>1</sub> (1)   |
| 346–354     | 41.72                         | [[2, 1] <sub>j</sub> , $\Lambda$ ] <sub>40</sub> (mixed)        | X <sub>15</sub> (9)  | 156–161     | 37.21                         | [[2, 0] <sub>2</sub> , 5] <sub>60</sub>                  | X <sub>10</sub> (6)  |
| 355–363     | 41.84                         | [[2, 1] <sub>j</sub> , $\Lambda$ ] <sub>40</sub> (mixed)        | X <sub>12</sub> (9)  | 162–173     | 37.78                         | [[2, 1] <sub>j</sub> , $\Lambda$ ] <sub>60</sub> (mixed) | X <sub>16</sub> (12) |
|             |                               |                                                                 |                      | 174–179     | 38.72                         | [[2, 0] <sub>2</sub> , 6] <sub>60</sub>                  | X <sub>11</sub> (6)  |

- 
- [1] R. Schmied and K. Lehmann, *J. Mol. Spectrosc.*, 2004, **226**, 201.
- [2] J. Sarka, A. G. Császár and E. Mátyus, *Phys. Chem. Chem. Phys.*, 2017, **19**, 15335.
